# Supplementary material for: Plasmonically Enhanced Superradiance of Broken-Symmetry Diamond Color Center Arrays Inside Core-Shell Nanoresonators
Source: MDPI journal article supplement (doi:10.3390/nano12030352), 2022-01-22
Supplement: s1 [file s1]

# Supplementary Material

## Plasmonically enhanced superradiance of broken-symmetry diamond color center arrays inside core-shell nanoresonators

Dávid Vass, András Szenes, Balázs Bánhelyi and Mária Csete\*

[\\*mcsete@physx.u-szeged.hu](mailto:mcsete@physx.u-szeged.hu)

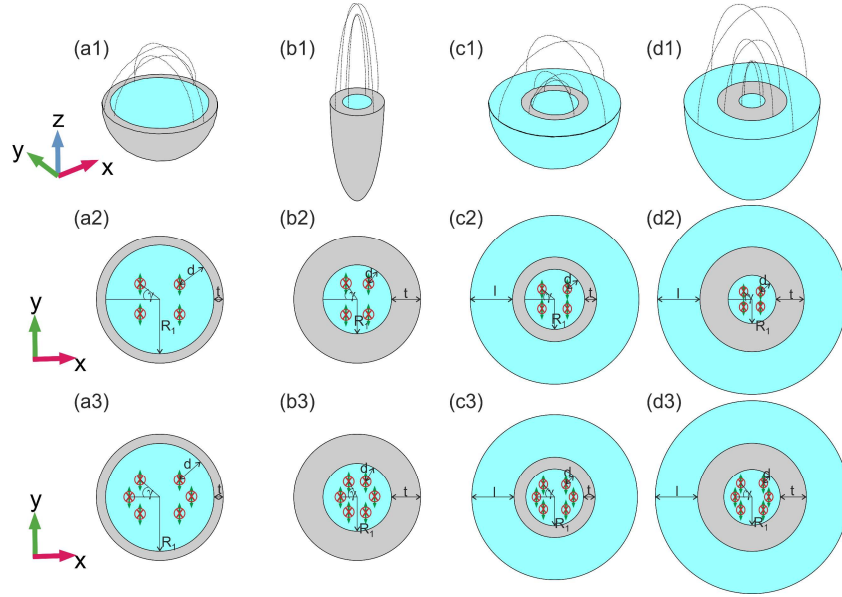

**Figure S1.** Schematics of the optimized coupled system types: (a-d/1) 3D view, and (a-d/2, a-d/3) x-y plane cross-section of the nanoresonators seeded by (a-d/2) 4 and (a-d/3) 6 emitters in case of (a/1-3, b/1-3) bare, (c/1-3, d/1-3) coated and (a & c/1-3) spherical, (b&d/1-3) ellipsoidal geometry.

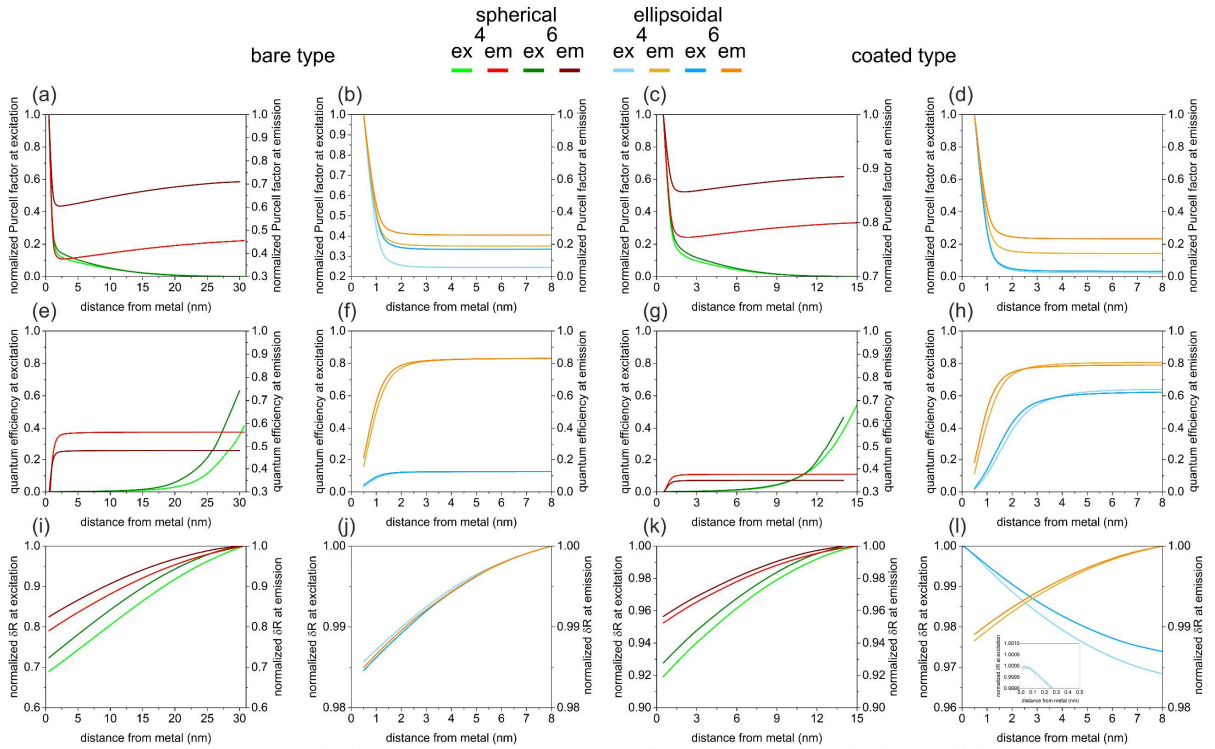

**Figure S2.** Optical responses normalized to unity as a function of emitter distance from metal. (a-d) The Purcell factor, (e-h) the quantum efficiency and (i-l) the radiative rate enhancement in case of (a, b, e, f, i, j) bare and (c, d, g, h, k, l) coated type, nanoresonators of (a, c, e, g, i, k) spherical, (b, d, f, h, j, l) ellipsoidal geometry.

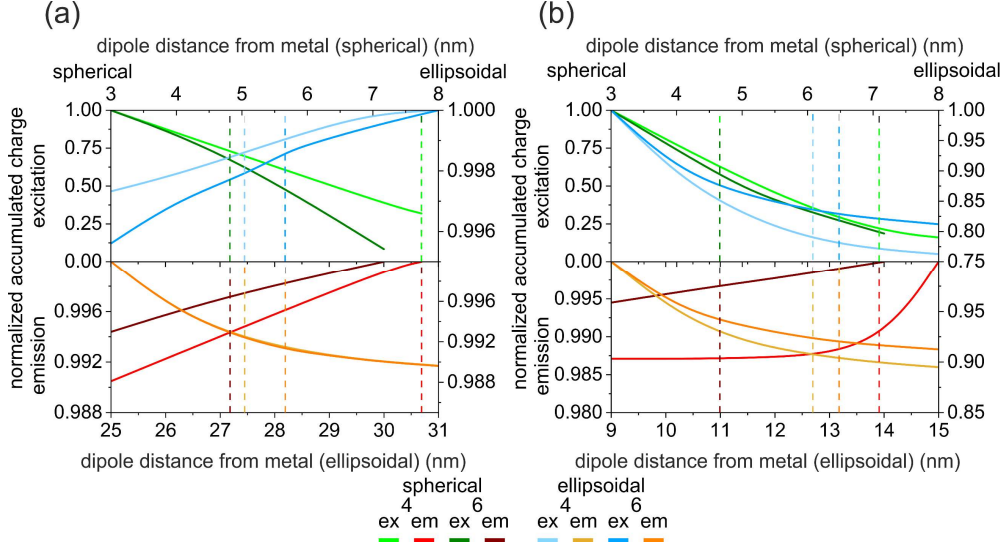

**Figure S3.** Electric charge accumulated on the optimized core-shell surface normalized to unity as a function of SiV color centers distance from the metal. (a) bare and (b) coated nanoresonators, at the excitation (upper) and at the emission (lower) wavelength. Each curve is presented in a dipole distance interval limited by the size of the nanoresonator.

Colors indicate, when certain quantity is larger in case of

|           |             |                           |
|-----------|-------------|---------------------------|
| 4         | 6           | number of emitters        |
| bare      | coated      | type of nanoresonator     |
| spherical | ellipsoidal | geometry of nanoresonator |

| geometry     | bare 4    |             | coated 4  |             | bare 6    |             | coated 6  |             |
|--------------|-----------|-------------|-----------|-------------|-----------|-------------|-----------|-------------|
|              | spherical | ellipsoidal | spherical | ellipsoidal | spherical | ellipsoidal | spherical | ellipsoidal |
| $R_1$ (nm)   | 38.05     | 10          | 17.67     | 10          | 34.2      | 10          | 17        | 10          |
| $R_2$ (nm)   | 38.05     | 69.97       | 17.67     | 32.47       | 34.2      | 70.02       | 17        | 31.65       |
| $t$ (nm)     | 6.61      | 8.54        | 7.17      | 16.78       | 5.82      | 8.55        | 6.94      | 16.08       |
| $d$ (nm)     | 30.69     | 5.04        | 13.91     | 6.08        | 27.18     | 5.66        | 10.99     | 6.48        |
| $GAR_1$      | 0.85      | 0.54        | 0.71      | 0.37        | 0.85      | 0.54        | 0.71      | 0.38        |
| $GAR_2$      | 0.85      | 0.89        | 0.71      | 0.66        | 0.85      | 0.89        | 0.71      | 0.66        |
| $\gamma$ (°) | 14.28     | 50.67       | 23.73     | 53.8        | 24.94     | 68.68       | 36.7      | 61.94       |

**Table S1.** Geometric parameters of optimized core-shell nanoresonators.  $R_1$  and  $R_2$  are the half short and long axes, respectively;  $t$  is the metal shell thickness,  $d$  is the emitter distance from the metal shell.  $GAR_1$  and  $GAR_2$  is the generalized aspect ratio corresponding to the long and short axes, respectively, defined as  $GAR=R/(R+t)$ ,  $\gamma$  is the azimuthal angle of emitters measured from the x-axis.

| optical response                               | bare_4    |             | coated_4  |             | bare_6    |             | coated_6  |             |
|------------------------------------------------|-----------|-------------|-----------|-------------|-----------|-------------|-----------|-------------|
|                                                | spherical | ellipsoidal | spherical | ellipsoidal | spherical | ellipsoidal | spherical | ellipsoidal |
| $QE_{ex}$ (%)                                  | 41.48     | 12.5        | 36.96     | 63.45       | 36.27     | 12.51       | 9.91      | 61.87       |
| $Purcell_{ex}$                                 | 11.16     | 9043.64     | 22.31     | 685.1       | 17.75     | 13621.61    | 122.81    | 901.02      |
| $\delta R_{ex}$ (a.u.)                         | 4.63      | 1130.27     | 8.25      | 434.68      | 6.44      | 1703.79     | 12.17     | 557.44      |
| $charge_{ex}$ (C)                              | 3.64E-21  | 9.55E-20    | 1.11E-20  | 4.79E-20    | 4.77E-21  | 1.43E-19    | 4.16E-20  | 6.84E-20    |
| $far-field_{ex}$ lobe max. (W/m <sup>2</sup> ) | 1.73E-10  | 2.25E-08    | 3.10E-10  | 8.22E-09    | 3.66E-10  | 5.09E-08    | 6.84E-10  | 1.58E-08    |
| $QE_{em}$ (%)                                  | 56.15     | 81.86       | 37.69     | 79.25       | 47.94     | 82.29       | 35.04     | 78.26       |
| $Purcell_{em}$                                 | 2682.22   | 841.71      | 12576.22  | 605.42      | 6410.09   | 1256.1      | 21756.12  | 1106.39     |
| $\delta R_{em}$ (a.u.)                         | 1506.1    | 689.04      | 4740.23   | 479.78      | 3073      | 1033.59     | 7622.26   | 865.81      |
| $charge_{em}$ (C)                              | 5.64E-20  | 2.31E-20    | 3.07E-19  | 3.94E-20    | 1.09E-19  | 3.46E-20    | 4.96E-19  | 6.61E-20    |
| $far-field_{em}$ lobe max. (W/m <sup>2</sup> ) | 1.56E-08  | 3.64E-09    | 4.87E-08  | 2.52E-09    | 4.73E-08  | 8.15E-09    | 1.17E-07  | 6.78E-09    |
| $P_x$ factor                                   | 6.97E+03  | 7.79E+05    | 3.91E+04  | 2.09E+05    | 1.98E+04  | 1.76E+06    | 9.27E+04  | 4.83E+05    |
| $P_x cQE$                                      | 3.92E+03  | 6.38E+05    | 1.47E+04  | 1.65E+05    | 9.48E+03  | 1.45E+06    | 3.25E+04  | 3.78E+05    |

**Table S2.** Optical responses of optimized systems.  $Purcell$  factor is the total decay rate enhancement,  $\delta R$  is the radiative decay rate enhancement of  $N$  emitters,  $QE$  is the antenna efficiency calculated as  $QE = \delta R / Purcell$ ,  $charge$  is the electric charge accumulated on the metal shell,  $far-field$  lobe max. is the maximal power radiated to the far-field at one meter from the structure, “ex” and “em” subscript refers to the excitation and emission configuration, respectively;  $P_x$  factor is the product of  $\delta R_{ex}$  and  $\delta R_{em}$  qualifying the non-cooperative fluorescence enhancement and  $P_x cQE$  is the  $P_x$  factor weighted by the corrected antenna efficiency (the objective function), that promotes to design superradiant systems.

| ratio            | bare_4    |             | coated_4  |             | bare_6    |             | coated_6  |             |
|------------------|-----------|-------------|-----------|-------------|-----------|-------------|-----------|-------------|
|                  | spherical | ellipsoidal | spherical | ellipsoidal | spherical | ellipsoidal | spherical | ellipsoidal |
| $rcQE$           | 1.01      | 1.04        | 1         | 1.05        | 1.01      | 1.04        | 1         | 1.04        |
| $r\delta R_{ex}$ | 3.98      | 4           | 3.99      | 4           | 5.97      | 6.01        | 5.97      | 6.01        |
| $r\delta R_{em}$ | 4.04      | 4.13        | 4         | 4.17        | 6.04      | 6.21        | 6.01      | 6.24        |
| $rP_x$           | 16.07     | 16.5        | 15.97     | 16.7        | 36.06     | 37.33       | 35.92     | 37.5        |
| $rP_x cQE$       | 16.23     | 17.2        | 15.97     | 17.53       | 36.32     | 38.91       | 36.01     | 39.16       |

**Table S3.** Enhancements compared to reference systems:  $rcQE$  is the corrected antenna efficiency ratio at the emission,  $r\delta R_{ex/em}$  is the radiative rate enhancement ratio at excitation/emission,  $rP_x$  is the total non-cooperative fluorescence enhancement and  $rP_x cQE$  is the weighted fluorescence enhancement ratio.

| normalized ratio   | bare_4    |             | coated_4  |             | bare_6    |             | coated_6  |             |
|--------------------|-----------|-------------|-----------|-------------|-----------|-------------|-----------|-------------|
|                    | spherical | ellipsoidal | spherical | ellipsoidal | spherical | ellipsoidal | spherical | ellipsoidal |
| $rcQE/I$           | 1.01      | 1.042       | 1         | 1.05        | 1.007     | 1.043       | 1.002     | 1.044       |
| $r\delta R_{ex}/N$ | 0.994     | 1           | 0.998     | 1           | 0.995     | 1.001       | 0.996     | 1.002       |
| $r\delta R_{em}/N$ | 1.01      | 1.031       | 1         | 1.044       | 1.007     | 1.035       | 1.002     | 1.04        |
| $rP_x/N^2$         | 1.004     | 1.031       | 0.998     | 1.043       | 1.002     | 1.037       | 0.998     | 1.042       |
| $rP_x cQE/N^2$     | 1.014     | 1.075       | 0.998     | 1.096       | 1.009     | 1.081       | 1         | 1.088       |
| $\Sigma rX$        | 1.007     | 1.036       | 0.999     | 1.047       | 1.004     | 1.039       | 1         | 1.043       |

**Table S4.** Enhancements compared to reference systems that are normalized by the emitter number  $N$  (or  $N^2$ ):  $rcQE$  is the corrected antenna efficiency ratio at the emission,  $r\delta R_{ex/em}$  is the radiative rate enhancement ratio at excitation/emission,  $rP_x$  is the total non-cooperative fluorescence enhancement and  $rP_x cQE$  is the weighted fluorescence enhancement ratio.  $\Sigma rX$  is the average of the five normalized ratios, quantifying the superradiance performance.

| nanoresonator qualification         |                      | bare_4    |             | coated_4  |             | bare_6    |             | coated_6  |             |
|-------------------------------------|----------------------|-----------|-------------|-----------|-------------|-----------|-------------|-----------|-------------|
|                                     |                      | spherical | ellipsoidal | spherical | ellipsoidal | spherical | ellipsoidal | spherical | ellipsoidal |
| <i>ecs</i>                          | <i>FWHM</i> (nm)     | 17.1      | 40.35       | 11.88     | 32.5        | 14.57     | 40.43       | 11.46     | 30.15       |
|                                     | <i>Q factor</i>      | 43.1      | 18.27       | 62.05     | 22.73       | 50.61     | 18.24       | 64.35     | 24.49       |
|                                     | $\Delta\lambda$ (nm) | -0.01     | 0.21        | 0.34      | 1.79        | 0.12      | 0.28        | 0.12      | 1.62        |
| <i>scs</i>                          | <i>FWHM</i> (nm)     | 17.17     | 40.08       | 11.81     | 32.5        | 14.64     | 40.16       | 11.37     | 30.16       |
|                                     | $\Delta\lambda$ (nm) | 0.5       | 0.59        | 1.08      | 2.43        | 0.55      | 0.66        | 0.88      | 2.25        |
| <i>Purcell</i>                      | <i>FWHM</i> (nm)     | 17.16     | 39.92       | 11.98     | 32          | 14.56     | 39.99       | 11.51     | 29.7        |
|                                     | <i>Q factor</i>      | 42.93     | 18.47       | 61.56     | 23.04       | 50.62     | 18.43       | 63.99     | 24.82       |
|                                     | $\Delta\lambda$ (nm) | -0.34     | 0.06        | 0.28      | 0.22        | -0.03     | 0.04        | -0.13     | 0.24        |
| $\delta R$                          | <i>FWHM</i> (nm)     | 17.03     | 40.26       | 11.9      | 32.31       | 14.5      | 40.34       | 11.48     | 29.97       |
|                                     | $\Delta\lambda$ (nm) | -0.33     | -0.02       | 0.13      | 0.07        | -0.04     | -0.05       | 0.03      | 0.09        |
| $\Delta f$ (nm)                     |                      | 0.32      | 0.23        | 0.21      | 1.72        | 0.16      | 0.33        | 0.09      | 1.53        |
| $\Delta f/\Delta\lambda_{\delta R}$ |                      | 0.97      | 11.5        | 1.62      | 24.57       | 4         | 6.6         | 3         | 17          |

**Table S5.** Spectral properties of the optimized core-shell nanoresonators. *FWHM* denotes the full-width-at-half-maximum,  $\Delta\lambda$  is the detuning from 737 nm emission wavelength of extinction (*ecs*), scattering (*scs*) cross-section, Purcell factor (*Purcell*) and radiative rate enhancement ( $\delta R$ ) spectra; *Q factor* is the nanoresonator quality factor calculated from *ecs* and *Purcell* spectra;  $\Delta f$  is the frequency pulling of the superradiant system specified in wavelength,  $\Delta f/\Delta\lambda_{\delta R}$  to facilitate comparison of pullings for the cold cavity and emitter.
